# Supplementary material for: The two tempos of nuclear pore complex evolution: highly adapting proteins in an ancient frozen structure
Source: PubMed Central journal article supplement (PMC1257468; doi:10.1186/gb-2005-6-10-r85), 2005-09-30
Supplement: gb-2005-6-10-r85-S4.pdf [file gb-2005-6-10-r85-S4.pdf]

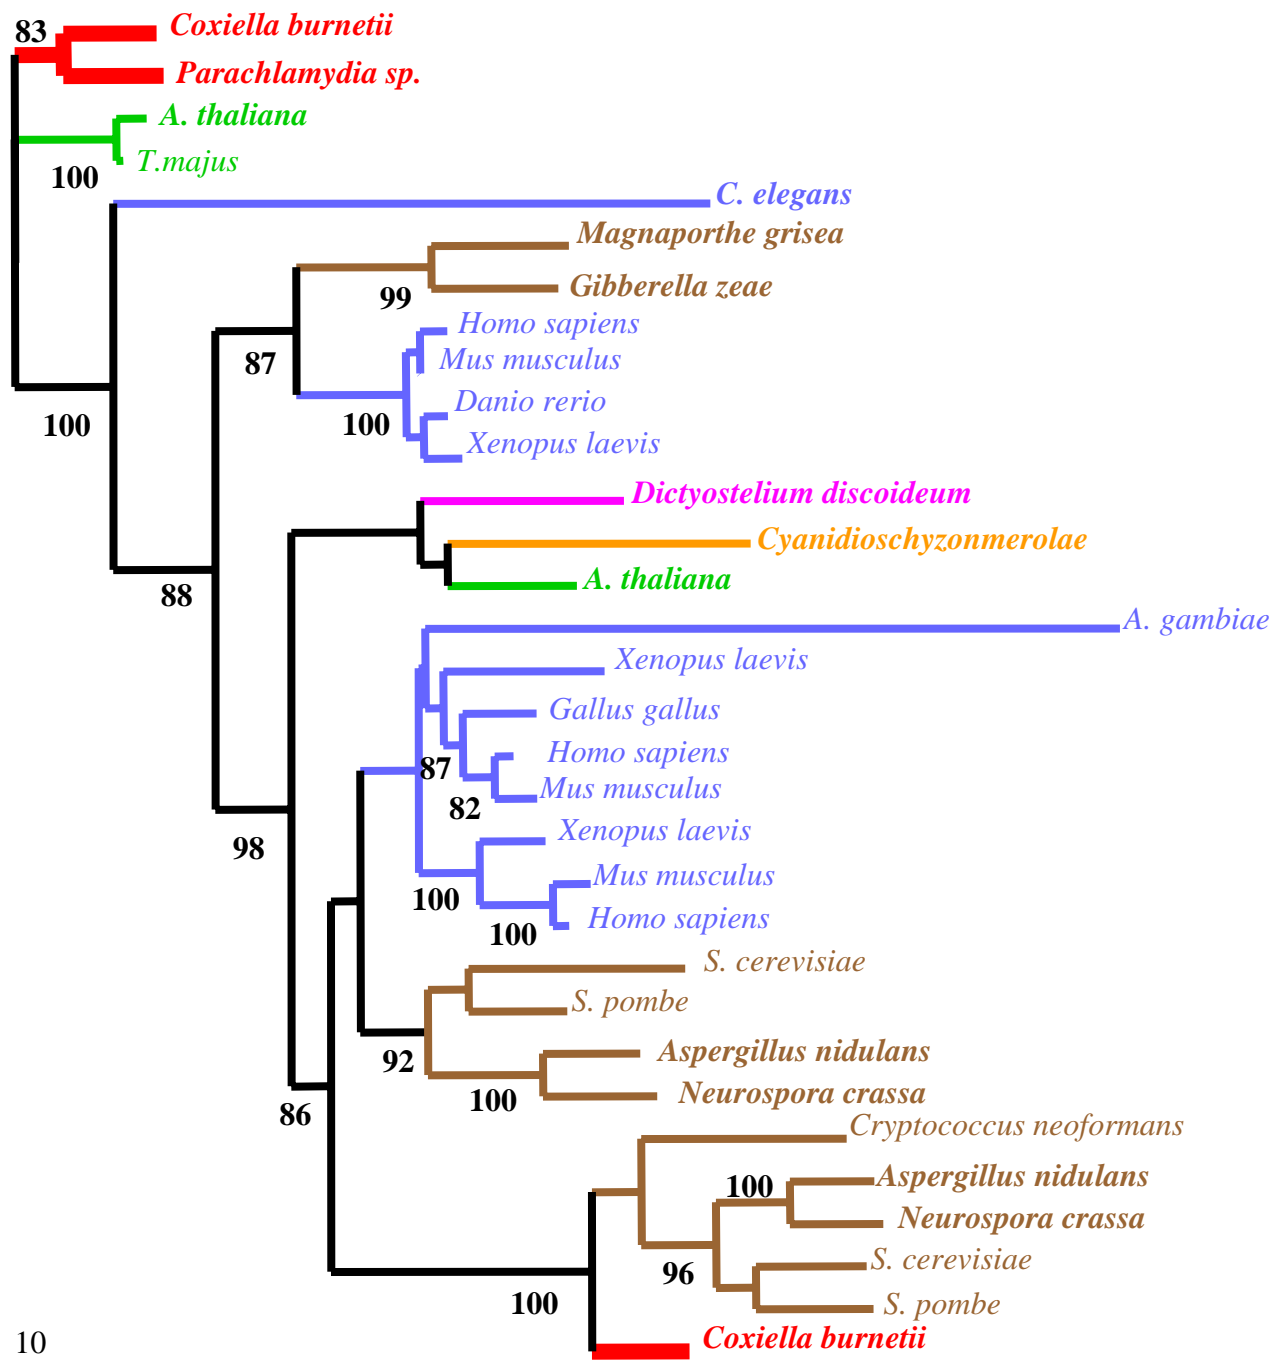

10
