# Supplementary material for: The two tempos of nuclear pore complex evolution: highly adapting proteins in an ancient frozen structure
Source: PubMed Central journal article supplement (PMC1257468; doi:10.1186/gb-2005-6-10-r85), 2005-09-30
Supplement: gb-2005-6-10-r85-S8.pdf [file gb-2005-6-10-r85-S8.pdf]

### **Metazoa:**

*D. rerio*, *S. mansoni*, *S. japonicum*, *A. americanum*, *A. gambiae*, *B. malayi*, *C. briggsae*: tblastn at ncbi:

**Fungi:** *P. carinii*, *N. crassa*, *A. fumigatus*, *A. nidulans*, *A. terreus*: tblastn at ncbi:

### **Green plants:**

*C. reinhardtii*: tblastn at ncbi

### **Rhodophyta:**

*P. yezoensis*: tblastn at <http://www.kazusa.or.jp/en/plant/porphyra/EST/>

### **Conosa:**

*D. dictyostelium*: tblastn at ncbi and at <http://genome.imb-jena.de/dictyostelium/>

*E. histolytica*, *E. invadens*, *E. terrapinae*, *E. dispar*, *E. moshkovskii*: tblastn at ncbi and <http://www.sanger.ac.uk/Projects/Protozoa/>

### **Diatoms/stramenopiles:**

*T. pseudonana* at <http://genome.jgi-psf.org/cgi-bin/runBlast?db=thaps1>

*P. infestans*: tblastn at ncbi

### **Kinetoplastids:**

*T. cruzi*: tblastn at ncbi

*T. brucei*: tblastn at ncbi and at <http://www.sanger.ac.uk/Projects/Protozoa/>

*L. major*: tblastn at ncbi and at <http://www.sanger.ac.uk/Projects/Protozoa/>

### **Alveolates:**

*P. chabaudi*: <http://www.sanger.ac.uk/Projects/Protozoa/>

*P. berghei*: <http://www.sanger.ac.uk/Projects/Protozoa/>

***P. vivax*: <http://www.sanger.ac.uk/Projects/Protozoa/>**

*P. yoelii*: tblastn at ncbi

*T. gondii*: tblastn at ncbi and at <http://www.sanger.ac.uk/Projects/Protozoa/>

*T. annulata* at <http://www.sanger.ac.uk/Projects/Protozoa/>

*C. parvum*: tblastn at ncbi.

*E. tennella*: <http://www.sanger.ac.uk/Projects/Protozoa/>

Many thanks at : <http://www.sanger.ac.uk/Projects/Protozoa/>, <http://genome.jgi-psf.org>, <http://genome.imb-jena.de> and <http://www.kazusa.or.jp>.
